# Supplementary material
Source: PubMed Central journal article supplement (PMC3004467)
Supplement: NIHMS255256-supplement-05.pdf [file NIHMS255256-supplement-05.pdf]

**Table S1 - Literature-based melanoma metastasis network**

| <b>Melanoma Genes</b> | <b>Metastasis Genes</b> |
|-----------------------|-------------------------|
| ABL1                  | ACAN                    |
| ADAM19                | ADAM19                  |
| AKT1                  | AGAP2                   |
| AKT2                  | AKT1                    |
| AKT3                  | AKT2                    |
| AKT1S1                | AKT3                    |
| ANGPT1                | AKT1S1                  |
| ACAN                  | ANGPT1                  |
| AURKB                 | AREG                    |
| BCL2                  | B4GALT5                 |
| BCR                   | BTC                     |
| BIRC5                 | CD14                    |
| BIRC7                 | CDH1                    |
| BRAF                  | CDKN2A                  |
| CASP1                 | CEACAM1                 |
| CD44                  | CSF1                    |
| CDC2                  | COL4A6                  |
| CDC2L6                | CXCL12                  |
| CDH1                  | DPP4                    |
| CDK2                  | EGFR                    |
| CDK3                  | EPHA2                   |
| CDK4                  | EZR                     |
| CDK5                  | F2R                     |
| CDK6                  | FBXW7                   |
| CDK7                  | GDF15                   |
| CDK8                  | GH1                     |
| CDK9                  | GZMB                    |
| CDK10                 | HBEGF                   |
| CDKN2A                | HGF                     |
| CHEK1                 | HIF1A                   |
| CHUK                  | HPSE                    |
| CLK2                  | IGFR                    |
| CLK4                  | IGF1                    |
| CRKRS                 | IGF2R                   |
| CSF1                  | ITGA2                   |
| CSF2RA                | ITGA5                   |
| CSF2RB                | ITGA6                   |
| CTLA4                 | ITGB1                   |
| COL4A6                | ITGB3                   |
| CXCL12                | ITGB4                   |
| D830050J10RIK         | ITGB5                   |
| DPP4                  | MAP2K1                  |
| EGFR                  | MAP2K2                  |
| EIF2AK2               | MAP2K5                  |
| EPHA2                 | MCAM                    |
| EPHA3                 | MMP2                    |
| EZR                   | MMP3                    |
| FBXW7                 | MST1R                   |
| FLT1                  | NFAT5                   |
| FLT3                  | NEDD9                   |
| FLT4                  | NOTCH1                  |
| FNTA                  | NUAK2                   |
| FNTB                  | PLAU                    |

|                          |        |
|--------------------------|--------|
| FYN                      | PLAUR  |
| GNRH1                    | PAR1   |
| GOLPH3                   | PTK2   |
| GZMB                     | RAF    |
| HDAC1                    | RAP1A  |
| HDAC2                    | SPP1   |
| HDAC3                    | TGFA   |
| HDAC4                    | TGFBR2 |
| HDAC5                    | VHL    |
| HDAC6                    | VTN    |
| HDAC7                    |        |
| HDAC8                    |        |
| HDAC10                   |        |
| HDAC11                   |        |
| HDAC9 (includes EG:9734) |        |
| HIF1A                    |        |
| HIPK2                    |        |
| HLA-E                    |        |
| HMGCR                    |        |
| HPSE                     |        |
| HRAS                     |        |
| HPSE                     |        |
| HSP90AA1                 |        |
| HSP90AA2                 |        |
| HSP90AB1                 |        |
| HSP90B1                  |        |
| IFNAR1                   |        |
| IFNAR2                   |        |
| IGF1                     |        |
| IGF2R                    |        |
| IL6                      |        |
| IL10                     |        |
| IL24                     |        |
| IL2RA                    |        |
| IL2RB                    |        |
| IL2RG                    |        |
| ILK                      |        |
| ITGA5                    |        |
| ITGA6                    |        |
| ITGA2                    |        |
| ITGA6                    |        |
| ITGB1                    |        |
| ITGB3                    |        |
| ITGB4                    |        |
| ITGB5                    |        |
| KDR                      |        |
| KIDINS220                |        |
| KIT                      |        |
| LCK                      |        |
| LIMK1                    |        |
| LKB1                     |        |
| MAP2K1                   |        |
| MAP2K2                   |        |
| MC1R                     |        |
| MITF                     |        |
| MCAM                     |        |

MGMT  
MAPK14  
MMP2  
MMP3  
MET  
MTOR  
NEDD9  
NEK6  
NEK7  
NF1  
NFAT5  
NR3C1  
NME1  
NOTCH1  
NRAS  
OBSCN (includes EG:84033)  
PAR1  
PLAU  
PLAUR  
PAX3  
PDGFRA  
PDGFRB  
PLK1  
PSMB5  
PTK2  
PTEN  
PTPN11  
RABGGTB  
RAS  
RAF  
RAP1A  
RASAL1  
RET  
RNF5 (includes EG:6048)  
RPS6KC1  
RHOA  
RRM2  
RUNX3  
RRM2B  
SGK3  
SHC1  
SILV  
SLC1A1  
SLC1A2  
SLC1A3  
SLC1A4  
SLC1A6  
SLC1A7  
SLIT2  
SOCS1  
SPP1  
SRC  
SOX10  
TAF4  
TAOK1  
TCN1

TECTA  
TGFB2  
TLR7  
TLR9  
TOP1  
TOP2B  
TP53  
TRPC2  
TRPM1  
TUBA4  
TUBA8  
TUBA1A  
TUBA1C  
TUBA3C  
TUBA4A  
TUBB1  
TYRO3  
VTN  
VEGFA  
WNT5A  
WNK1  
XPC  
YES1
